# Supplementary material for: Dengue in Cambodia 2002–2020: Cases, Characteristics and Capture by National Surveillance
Source: PubMed Central journal article supplement (PMC10274987; doi:10.1101/2023.04.27.23289207), 2023-04-28

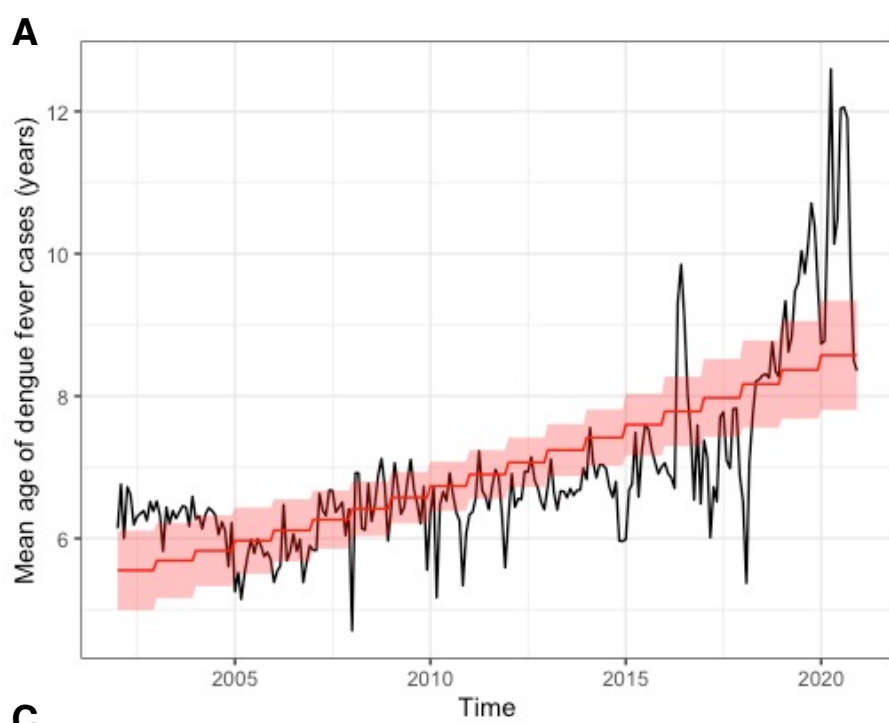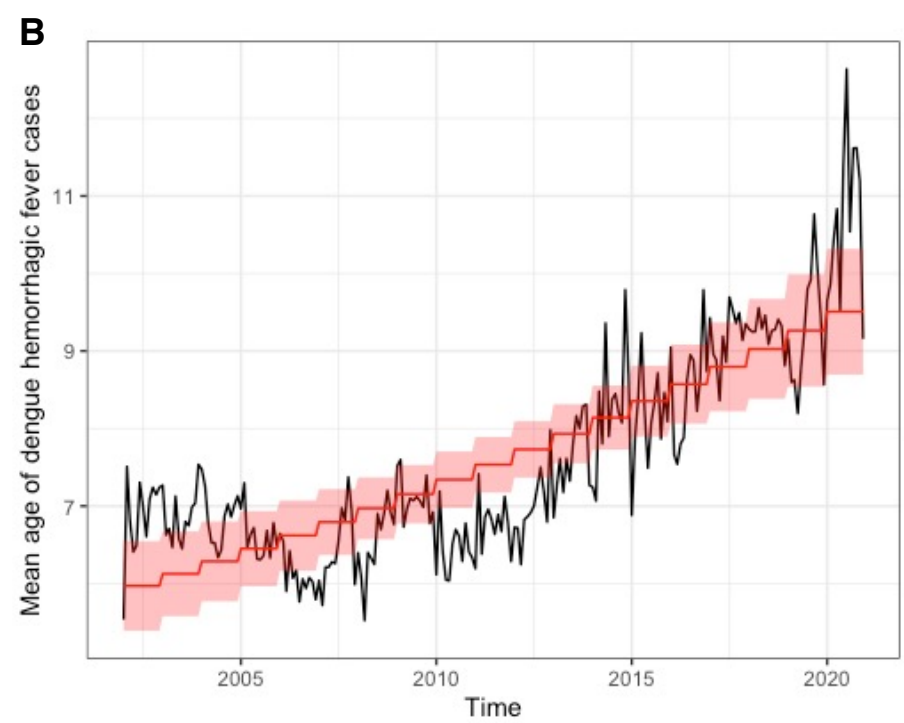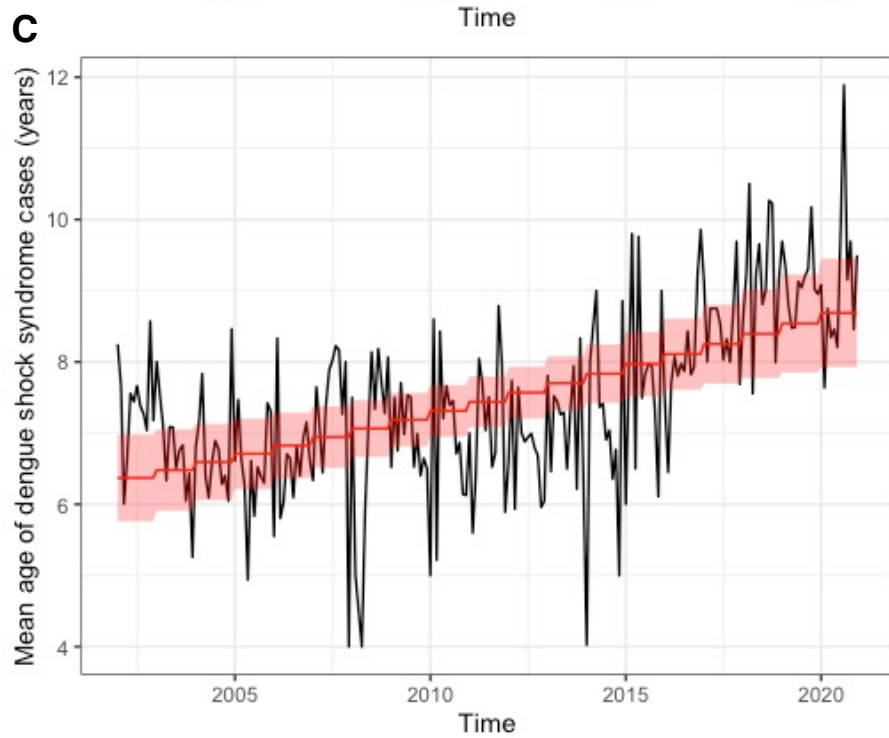

Supplement: media-3.pdf [file media-3.pdf]
